# Supplementary material for: Detection of intracellular monosodium urate crystals in gout synovial fluid using optical diffraction tomography
Source: PubMed Central journal article supplement (PMC8113554; doi:10.1038/s41598-021-89337-7), 2021-05-11
Supplement: 41598_2021_89337_MOESM1_ESM.pdf [file 41598_2021_89337_MOESM1_ESM.pdf]

# **Detection of intracellular monosodium urate crystals in gout synovial fluid using optical diffraction tomography**

Sangwoo Park<sup>1,2#</sup>, Lucy Eunju Lee<sup>3#</sup>, Hanna Kim<sup>3</sup>, Ji Eun Kim<sup>3</sup>, Seung Jun Lee<sup>3,4</sup>, Sunggyu Yoon<sup>1</sup>,  
Seungwoo Shin<sup>5</sup>, Heemin Kang<sup>2</sup>, YongKeun Park<sup>5,6,7</sup>, Jason Jungsik Song<sup>3,8\*</sup>, Seongsoo Lee<sup>1\*</sup>

<sup>1</sup>Division of Aging Research, Gwangju Center, Korea Basic Science Institute (KBSI), Gwangju 61751, Korea

<sup>2</sup>Department of Materials Science and Engineering, Korea University, Seoul 02841, Korea

<sup>3</sup>Division of Rheumatology, Department of Internal Medicine, Yonsei University College of Medicine, Seoul 03722, Korea

<sup>4</sup>Synapse Center, Yonsei University College of Medicine, Seoul 03722, Korea

<sup>5</sup>Department of Physics, Korea Advanced Institute of Science and Technology (KAIST), Daejeon 34141, Korea

<sup>6</sup>KAIST Institute for Health Science and Technology, KAIST, Daejeon 34141, Korea

<sup>7</sup>Tomocube Inc., Daejeon 34051, Korea

<sup>8</sup>Institute for Immunology and Immunological Diseases, Yonsei University College of Medicine, Seoul 03722, Korea

# These authors contributed equally to this work.

\* These authors jointly supervised this work. Correspondence and requests for materials should be addressed to S.L. (e-mail: soolee@kbsi.re.kr) and J. J. S. (e-mail: [JSKSONG@yuhs.ac](mailto:JSKSONG@yuhs.ac))

## **Address correspondence to:**

Jason Jungsik Song, M.D., Ph.D.

Division of Rheumatology, Department of Internal Medicine, Yonsei University College of Medicine

50-1 Yonsei-ro, Seodaemun-gu, Seoul 03722, South Korea

Tel: +82-2-2228-1930, Fax: +82-2-393-6884, E-mail: JSKSONG@yuhs.ac

ORCID: 0000-0003-0662-7704

Seongsoo Lee, Ph.D.

Division of Aging Research, Gwangju Center, Korea Basic Science Institute (KBSI)

49 Dosischeomdansaneop-ro, Nam-gu, Gwangju 61751, South Korea

Tel: +82-62-712-4419, Fax: +82-62-530-0519, E-mail: soolee@kbsi.re.kr

ORCID: 0000-0002-8012-9749

## Supplementary information

**Supplementary Movie S1.** 3D morphological structure of monosodium urate (MSU) crystals.

**Supplementary Movie S2.** Time-lapse monitoring of macrophagic THP-1 cells with MSU crystals (10  $\mu\text{g}/\text{mL}$ ). The MSU crystals with  $\text{RI} \geq 1.385$  are indicated in purple.

**Supplementary Movie S3.** 3D holotomographic image of synovial leukocytes. The MSU crystals with  $\text{RI} \geq 1.385$  are indicated in purple.

**Supplementary Movie S4.** 3D morphological structure of RAW264.7 cells with MSU crystals (200  $\mu\text{g}/\text{mL}$ ). The MSU crystals with  $\text{RI} \geq 1.385$  are indicated in purple.

**Supplementary Movie S5.** Time-lapse monitoring of RAW264.7 cells with MSU crystals (10  $\mu\text{g}/\text{mL}$ ). The MSU crystals with  $\text{RI} \geq 1.385$  are indicated in purple.

**Supplementary Figure S1.** Cellular volume of THP-1 cells with or without phorbol 12-myristate 13-acetate (PMA). Data are shown as the mean  $\pm$  SEM.

**Supplementary Figure S2.** Three-dimensional (3D) optical diffraction tomography (ODT) of murine RAW 264.7 cells with or without MSU crystals. **(a)** 3D RI distribution of RAW 264.7 cells. **(b)** RAW 264.7 cells treated with 50  $\mu\text{g}/\text{mL}$  MSU crystals. **(c)** RAW 264.7 cells treated with 200  $\mu\text{g}/\text{mL}$  MSU crystals. Each square shows the x-y, y-z, or x-z plane. Additionally, refer to Supplementary Movies S4–S5. n: refractive index.

## Supplementary methods

### Culture of RAW 264.7 macrophage cell line

The murine RAW 264.7 macrophage cell line (TIB-71, ATCC, Manassas, VA, USA) was used. RAW 264.7 cells were cultured in Dulbecco's Modified Eagle's Medium (Welgene, Gyeongsan, Korea) supplemented with 10% fetal bovine serum, 1% penicillin, and 1% streptomycin at 37  $^{\circ}\text{C}$  in a humidified 5%  $\text{CO}_2$  incubator. Thereafter,  $1 \times 10^5$  RAW 264.7 cells were sub-cultured in a specialized

culture dish (TomoDish, Tomocube, Daejeon, Korea) and incubated in a stage-top humidified incubator (TomoChamber, Tomocube) at 37 °C in a humidified 5% CO<sub>2</sub> incubator. The incubated RAW 264.7 cells were monitored before (**Supplementary Figure S2a**) and after treatment with 50 µg/mL (**Supplementary Figure S2b**) or 100 µg/mL (**Supplementary Figure S2c**) of synthetic MSU crystals (InvivoGen) using ODT (HT-2H, Tomocube) (**Supplementary Movie S4** and **S5**).
